# Supplementary material
Source: PubMed Central journal article supplement (PMC4617407)
Supplement: supp_D059758_jlr.D059758-1.pdf [file supp_D059758_jlr.D059758-1.pdf]

**Supplementary Figure 1: Relative expression of *CEBPB*, *PPARG*, *GLUT4*, *ADIPOQ*, *PLIN* and *FABP4* during 21 days of adipogenesis in SGBS cells.** Expression levels of target genes were determined by quantitative RT-PCR and are normalized to the control GAPDH gene.

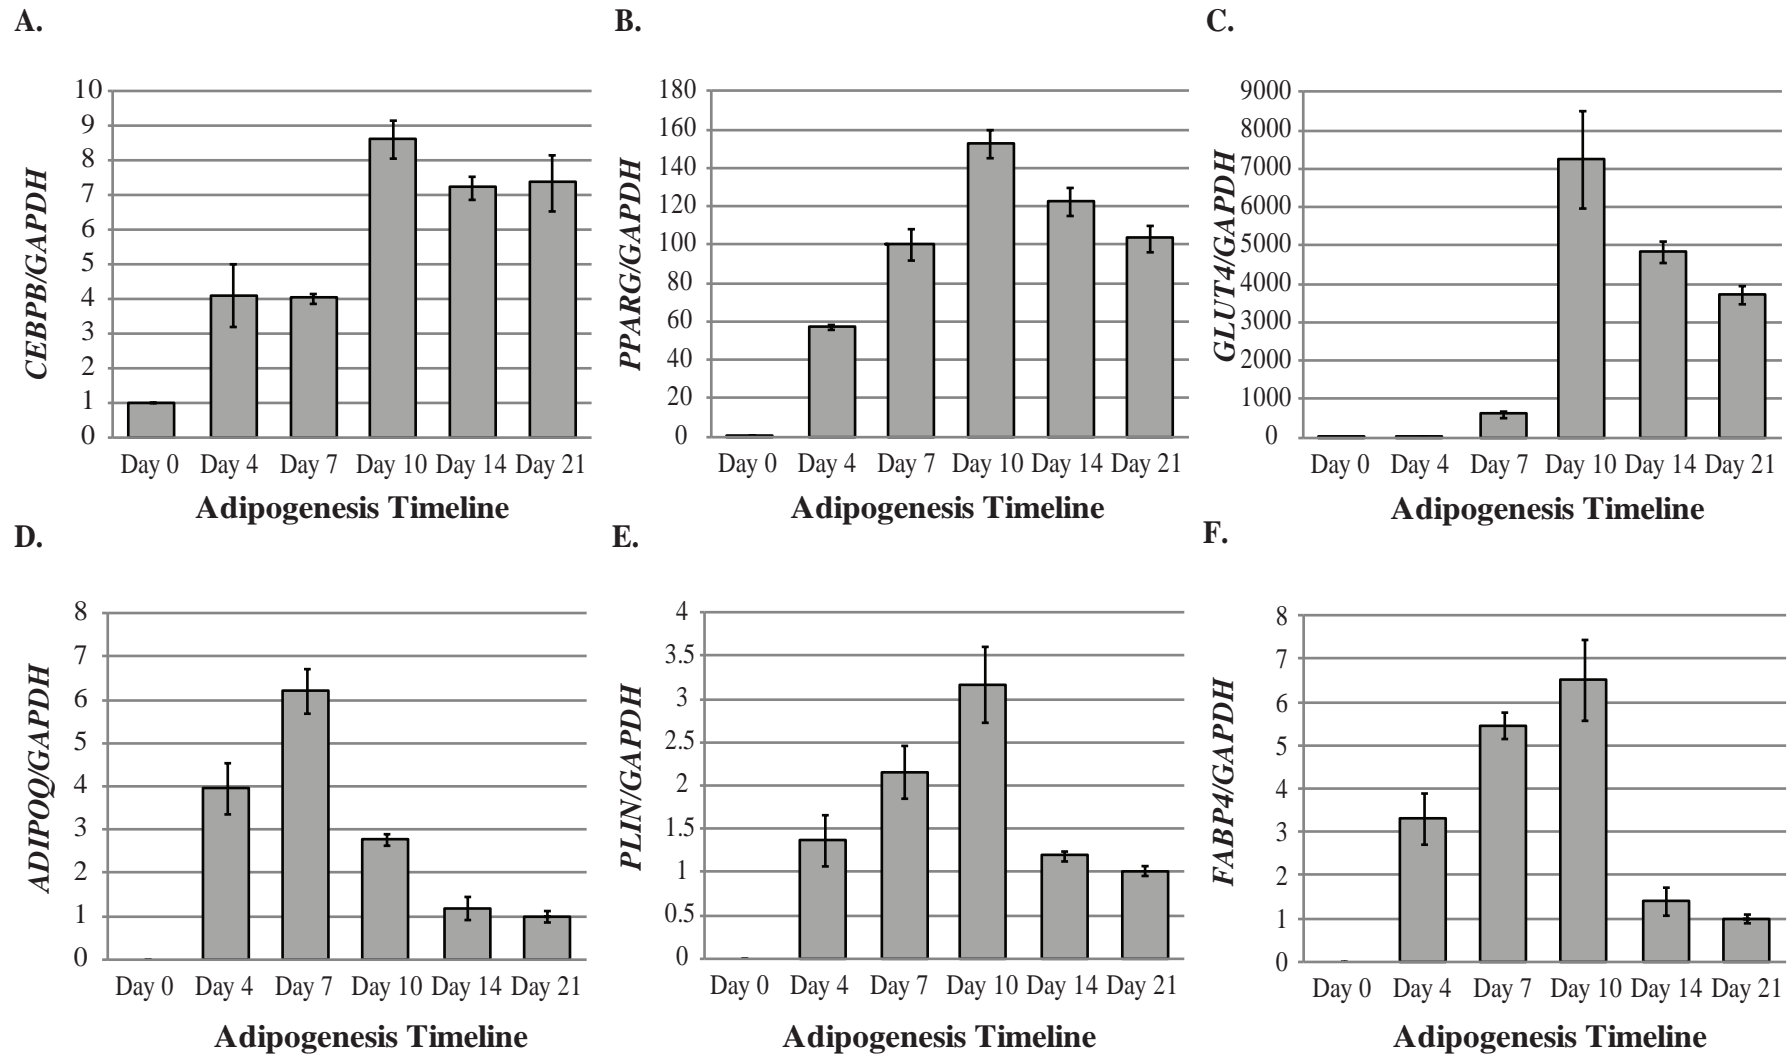

**Supplementary Figure 2: LipiD-QuanT performance on synthetic images with LDs and drawbacks of Oil Red O staining method for monitoring adipogenesis.**

- A-** The LD diameter size density distribution is consistent between images taken from different parts of the same well containing 2  $\mu\text{mol/L}$  Rosiglitazone treated cells on day 14 (n=4,572 LDs in 6 images).
- B-** The LD diameter size density distribution is consistent between images taken from different parts of the same well containing untreated cells on day 14 (n =1,679 LDs in 6 images).
- C-** Oil Red O stained SGBS adipocytes with a few burst LDs and high background staining under phase contrast microscopy.
- D-** Oil Red O stained SGBS adipocytes with a few burst LDs with three dimensional mapping using Cytoviva microscopy.
- E-** Phase contrast image of well-fixed and Oil Red O stained mature SGBS adipocytes. This illustrates the variability of Oil Red O staining, as apparent by the variability in staining intensities of LD's of similar sizes.

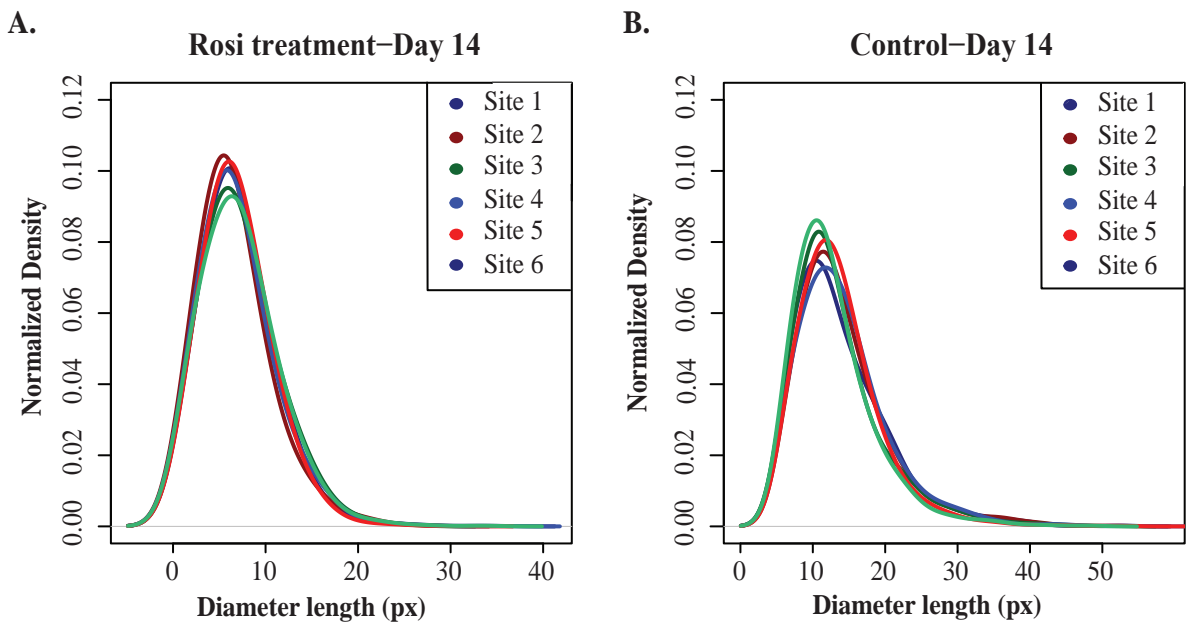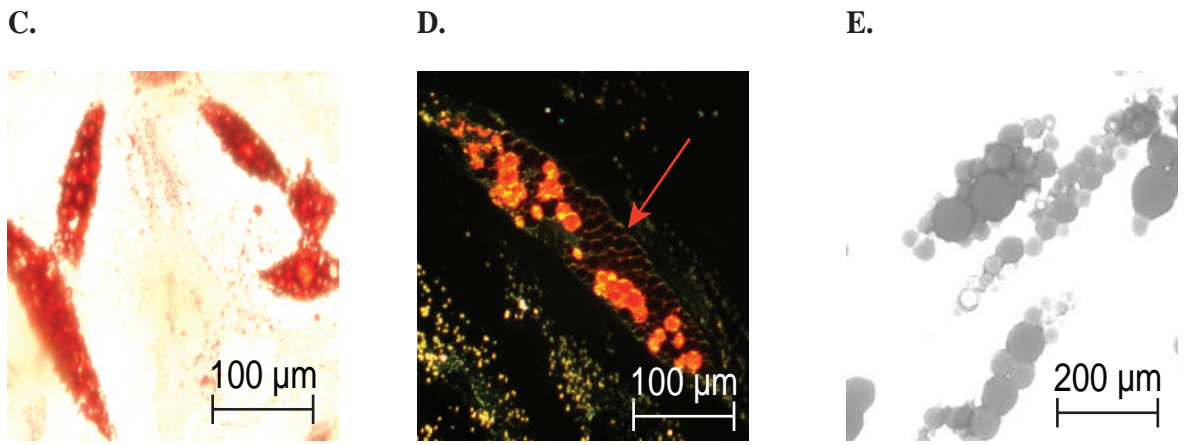

Supplementary Table 1: Sequence of PCR primers used in quantitative RT-PCR.

| Gene Name (Human)                                                                                | Gene Bank ID | Amplicon (nt) | Primer Name            | Length | Sequence                 |
|--------------------------------------------------------------------------------------------------|--------------|---------------|------------------------|--------|--------------------------|
| <b>Glyceraldehyde-3-phosphate dehydrogenase (<i>GAPDH</i>)</b>                                   | NM_002046.3  | 66            | <b>GAPDH-Forward</b>   | 19     | AGCCACATCGCTCAGACAC      |
|                                                                                                  |              |               | <b>GAPDH-Reverse</b>   | 19     | GCCAATACGACCAAATCC       |
| <b>CCAAT/enhancer binding protein (C/EBP), beta (<i>CEBPB</i>)</b>                               | NM_005194.2  | 65            | <b>CEBPB-Forward</b>   | 18     | CGCTTACCTCGGCTACCA       |
|                                                                                                  |              |               | <b>CEBPB-Reverse</b>   | 19     | ACGAGGAGGACGTGGAGAG      |
| <b>Peroxisome proliferator-activated receptor gamma (<i>PPARG</i>)</b>                           | NM_138712.3  | 96            | <b>PPARG-Forward</b>   | 24     | GACAGGAAAGACAACAGACAAATC |
|                                                                                                  |              |               | <b>PPARG-Reverse</b>   | 21     | GGGGTGATGTGTTTGA ACTTG   |
| <b>Adiponectin, C1Q and collagen domain containing (<i>ADIPOQ</i>)</b>                           | NM_004797.3  | 61            | <b>ADIPOQ- Forward</b> | 21     | GGTGAGAAGGGTGAGAAAGGA    |
|                                                                                                  |              |               | <b>ADIPOQ- Reverse</b> | 21     | TTTACCGATGTCTCCCTTAG     |
| <b>Perilipin 1 (<i>PLIN</i>)</b>                                                                 | NM_002666.4  | 101           | <b>PLIN-Forward</b>    | 24     | ACATTAAAGGGAAGAAGTTGAAGC |
|                                                                                                  |              |               | <b>PLIN-Reverse</b>    | 19     | GCAGCACATTCTCCTGCTC      |
| <b>Solute carrier family 2 (facilitated glucose transporter), member 4 (<i>SLC2A4/GLUT4</i>)</b> | NM_001042.2  | 62            | <b>GLUT4-Forward</b>   | 20     | CTGTGCCATCCTGATGACTG     |
|                                                                                                  |              |               | <b>GLUT4-Reverse</b>   | 20     | CGTAGCTCATGGCTGGA ACT    |
| <b>Fatty acid binding protein 4, adipocyte (<i>FABP4</i>)</b>                                    | NM_001442.2  | 70            | <b>FABP4-Forward</b>   | 23     | CCACCATAAAGAGAAAACGAGAG  |
|                                                                                                  |              |               | <b>FABP4-Reverse</b>   | 20     | GTGGAAGTGACGCCTTTCAT     |
